# Supplementary material
Source: PubMed Central journal article supplement (PMC1560027)
Supplement: rspb20053294s05.pdf [file rspb20053294s05.pdf]

## Electronic Supplementary Material

Section 1. P-values of two-tailed t-tests for differences between age classes of additive genetic variance (elements above the diagonal) and heritability (elements below the diagonal) of laying date. Highlighted in bold are P-values smaller than  $\alpha = 0.05$ .

|       | 3      | 4             | 5             | 6             | 7             | 8             | 9             | 10            | 11            | 12-13         | 14-15         | 16-20  |
|-------|--------|---------------|---------------|---------------|---------------|---------------|---------------|---------------|---------------|---------------|---------------|--------|
| 3     |        | 0.5911        | 0.2105        | 0.2105        | 0.2106        | 0.2107        | 0.2108        | 0.8784        | 0.2110        | 0.5438        | 0.1173        | 0.3142 |
| 4     | 0.5910 |               | 0.2255        | 0.2255        | 0.2256        | 0.2256        | 0.2257        | 0.7301        | 0.2257        | 0.1707        | <b>0.0355</b> | 0.2217 |
| 5     | 0.1702 | 0.2091        |               | 1             | 1             | 1             | 1             | 0.3018        | 1             | <b>0.0206</b> | <b>0.0092</b> | 0.1517 |
| 6     | 0.1703 | 0.2092        | 1             |               | 1             | 1             | 1             | 0.3018        | 1             | <b>0.0206</b> | <b>0.0092</b> | 0.1519 |
| 7     | 0.1704 | 0.2092        | 1             | 1             |               | 1             | 1             | 0.3019        | 1             | <b>0.0207</b> | <b>0.0093</b> | 0.1520 |
| 8     | 0.1705 | 0.2093        | 1             | 1             | 1             |               | 1             | 0.3020        | 1             | <b>0.0207</b> | <b>0.0093</b> | 0.1522 |
| 9     | 0.1706 | 0.2093        | 1             | 1             | 1             | 1             |               | 0.3021        | 1             | <b>0.0208</b> | <b>0.0094</b> | 0.1524 |
| 10    | 0.6405 | 0.9602        | 0.2765        | 0.2766        | 0.2767        | 0.2768        | 0.2768        |               | 0.3022        | 0.4428        | 0.0935        | 0.2851 |
| 11    | 0.1708 | 0.2094        | 1             | 1             | 1             | 1             | 1             | 0.2770        |               | <b>0.0209</b> | <b>0.0095</b> | 0.1528 |
| 12-13 | 0.9674 | 0.4294        | <b>0.0022</b> | <b>0.0022</b> | <b>0.0022</b> | <b>0.0022</b> | <b>0.0022</b> | 0.5290        | <b>0.0023</b> |               | 0.2390        | 0.4365 |
| 14-15 | 0.3391 | <b>0.0158</b> | <             | <             | <             | <             | <             | <b>0.0474</b> | <             | <b>0.0500</b> |               | 0.8984 |
|       |        |               | <b>0.0001</b> | <b>0.0001</b> | <b>0.0001</b> | <b>0.0001</b> | <b>0.0001</b> |               | <b>0.0001</b> |               |               |        |
| 16-20 | 0.5880 | 0.1452        | <b>0.0016</b> | <b>0.0016</b> | <b>0.0016</b> | <b>0.0016</b> | <b>0.0017</b> | 0.2078        | <b>0.0017</b> | 0.3708        | 0.6093        |        |

Section 2. Age-specific selection differentials ( $S$ ) for laying date in the mute swan.  $n$  = number of breeding attempts.

| age     | fitness = number of hatchlings |        |       |        |            | fitness = number of recruited offspring |        |       |       |            |
|---------|--------------------------------|--------|-------|--------|------------|-----------------------------------------|--------|-------|-------|------------|
|         | n                              | $S$    | SE    | t      | $p$ -value | n                                       | $S$    | SE    | t     | $p$ -value |
| 3       | 141                            | -0.169 | 0.064 | -2.64  | 0.0092     | 120                                     | -0.414 | 0.276 | -1.5  | 0.1356     |
| 4       | 270                            | -0.173 | 0.034 | -5.16  | <.0001     | 198                                     | -0.414 | 0.154 | -2.68 | 0.0079     |
| 5       | 320                            | -0.207 | 0.030 | -6.98  | <.0001     | 248                                     | -0.486 | 0.131 | -3.71 | 0.0003     |
| 6       | 279                            | -0.252 | 0.033 | -7.61  | <.0001     | 226                                     | -0.374 | 0.128 | -2.93 | 0.0038     |
| 7       | 230                            | -0.185 | 0.037 | -5.05  | <.0001     | 184                                     | -0.166 | 0.165 | -1.01 | 0.3155     |
| 8       | 186                            | -0.325 | 0.044 | -7.44  | <.0001     | 150                                     | -0.486 | 0.186 | -2.61 | 0.01       |
| 9       | 168                            | -0.197 | 0.038 | -5.22  | <.0001     | 126                                     | -0.346 | 0.184 | -1.89 | 0.0615     |
| 10      | 139                            | -0.148 | 0.036 | -4.14  | <.0001     | 86                                      | -0.481 | 0.191 | -2.51 | 0.0138     |
| 11      | 121                            | -0.202 | 0.046 | -4.41  | <.0001     | 74                                      | -0.464 | 0.168 | -2.76 | 0.0073     |
| 12      | 97                             | -0.146 | 0.054 | -2.7   | 0.0082     | 61                                      | -0.129 | 0.214 | -0.6  | 0.5493     |
| 13      | 63                             | -0.089 | 0.080 | -1.1   | 0.2737     | 36                                      | -0.020 | 0.253 | -0.08 | 0.9371     |
| 14      | 45                             | -0.089 | 0.075 | -1.19  | 0.241      | 25                                      | -0.332 | 0.311 | -1.07 | 0.2968     |
| 15      | 25                             | -0.286 | 0.121 | -2.36  | 0.0272     | 11                                      | -0.070 | 0.355 | -0.2  | 0.8482     |
| 16      | 20                             | -0.187 | 0.087 | -2.16  | 0.0444     | 9                                       | -1.700 | 0.616 | -2.76 | 0.0281     |
| 17      | 13                             | -0.402 | 0.171 | -2.36  | 0.0379     | 5                                       | 0.462  | 1.433 | 0.32  | 0.7684     |
| 18      | 5                              | -0.436 | 0.066 | -6.56  | 0.0072     |                                         |        |       |       |            |
| overall | 2122                           | -0.194 | 0.012 | -17.43 | <.0001     | 1559                                    | -0.357 | 0.053 | -7.09 | <.0001     |
